# Supplementary material for: Elevated EDAR signalling promotes mammary gland tumourigenesis with squamous metaplasia
Source: PubMed Central journal article supplement (PMC8837535; doi:10.1038/s41388-021-01902-6), 2021-12-16

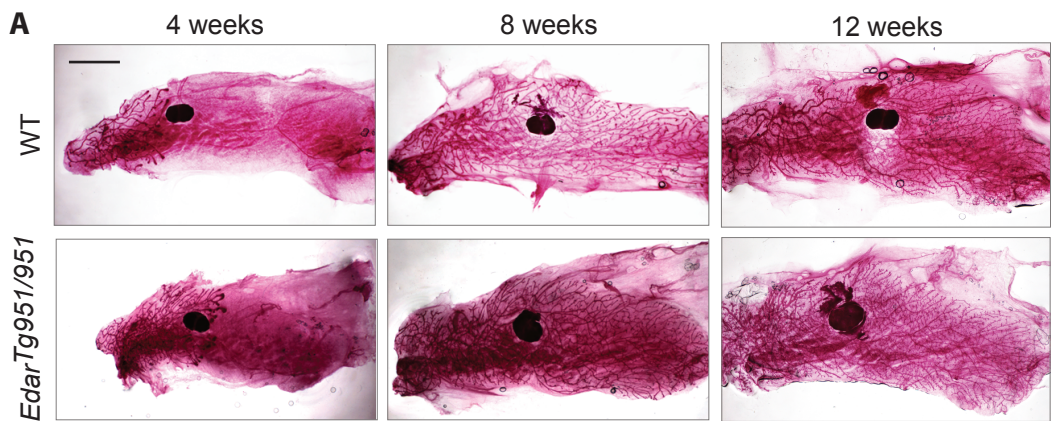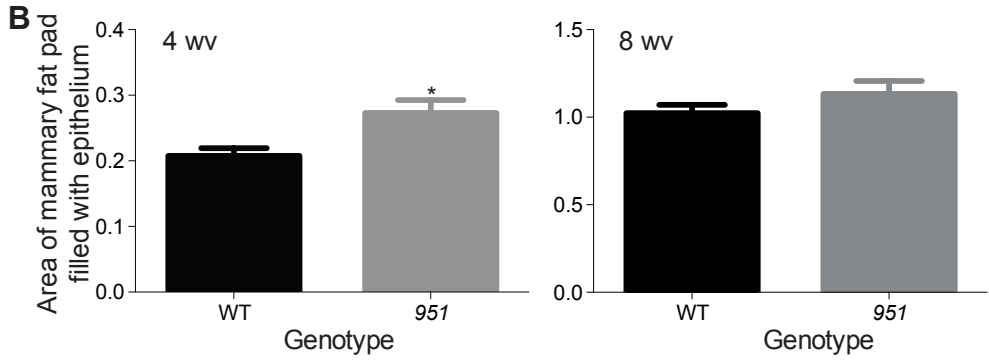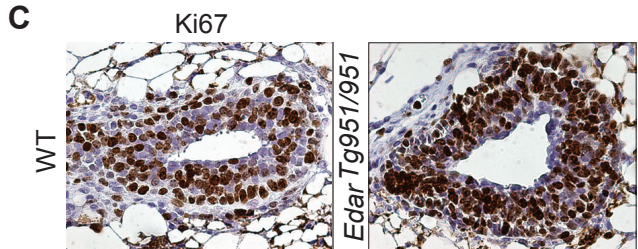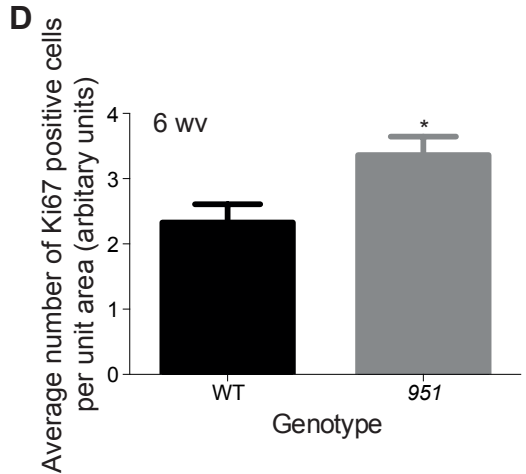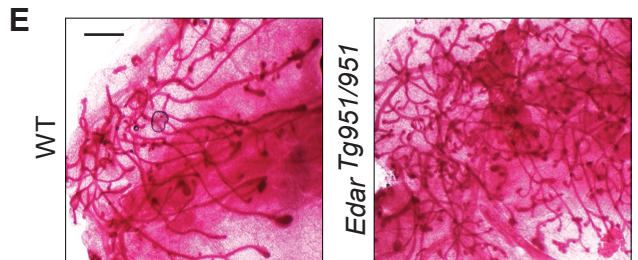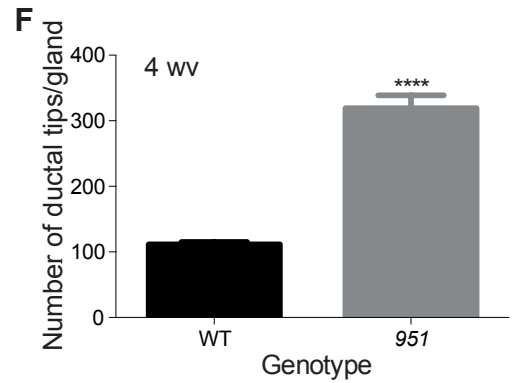

Supplement: 41388_2021_1902_MOESM3_ESM.pdf [file 41388_2021_1902_MOESM3_ESM.pdf]
